# Supplementary material for: Synthesis of bicyclic organo-peptide hybrids via oxime/intein-mediated macrocyclization followed by disulfide bond formation
Source: Royal Society of Chemistry journal article supplement (doi:10.1039/c3ob42222d), 2014-01-01
Supplement: c3ob42222d.pdf [file c3ob42222d.pdf]

Supplemental Information for

# **Synthesis of bicyclic organo-peptide hybrids via oxime/intein-mediated macrocyclization followed by disulfide bond formation**

Jessica M. Smith, Nicholas C. Hill, Peter J. Krasniak, and Rudi Fasan\*

*<sup>1</sup>Department of Chemistry, University of Rochester, Rochester, New York 14627, USA.*

\*fasan@chem.rochester.edu

## **Table of Contents:**

|                             |             |
|-----------------------------|-------------|
| Supplementary Table S1      | Page S2     |
| Supplementary Figures S1-S5 | Page S3-S21 |

**Supplementary Table S1:** Oligonucleotide primers

| <b>Primer</b>        | <b>Sequence</b>                          |
|----------------------|------------------------------------------|
| 8/10mer(C@U+1)_for   | 5'-GCATCCCATGGCTAGTGC GGATCC-3'          |
| 8mer(C@U+2)_for      | 5'-GCATCCCATGGCTAGACATGCTCCGCC-3'        |
| 8mer(C@U+3)_for      | 5'-GCATCCCATGGCTAGACAGGATGCGCCGA-3'      |
| 8mer(C@U+4)_for      | 5'-CCACAGGATCCTGCGAATACGGCACC-3'         |
| 8mer(C@U+5)_for      | 5'-CCACAGGATCCGCCTGCTACGGCACC-3'         |
| 8mer(C@U+6)_for      | 5'-CCACAGGATCCGCCGAATGCGGCACC-3'         |
| 8mer(C@U+7)_for      | 5'-CCACAGGATCCGCCGAATACTGCACCTG-3'       |
| 10mer(C@U+2)_for     | 5'-GCATCCCATGGCTAGACATGCTCCAAACTG-3'     |
| 10mer(C@U+3)_for     | 5'-GCATCCCATGGCTAGACAGGATGCAAACTG-3'     |
| 10mer(C@U+4)_for     | 5'-CAACAGGATCCTGCCTGGCCGAATACGG-3'       |
| 10mer(C@U+5)_for     | 5'-CAACAGGATCCAAATGCGCCGAATACGG-3'       |
| 10mer(C@U+6)_for     | 5'-CAACAGGATCCAAACTGTGCGAATACGG-3'       |
| 10mer(C@U+7)_for     | 5'-CAACAGGATCCAAACTGGCCTGCTACGG-3'       |
| 10mer(C@U+8)_for     | 5'-CAACAGGATCCAAACTGGCCGAATGCGG-3'       |
| 10mer(C@U+9)_for     | 5'-CAACAGGATCCAAACTGGCCGAATACTGCACCTG-3' |
| T7 terminator primer | 5'-GCTAGTTATTGCTCAGCGG-3'                |
| T7_term_long         | 5'-GCTAGTTATTGCTCAGCGGTGGC-3'            |

**Supplementary Figure S1.** MALDI-TOF MS analysis of the reactions between **1** (SP6) and the 8mer biosynthetic precursors (MG8 series, Table 1). Spectra correspond to the three hour (*left*) and 24 hour time point (*center*) after addition of **1** and one hour time point after addition of BPDS (*right*). Peaks corresponding to the proton ( $[M+H]^+$ ), sodium ( $[M+Na]^+$ ), and potassium ( $[M+K]^+$ ) adducts of the MOrPH ('m'), self-cyclized thiolactone ('sc') and bicyclic product ('b') are labeled. When no self-cyclized product is formed, the 24 hr-time point spectrum is omitted as it is identical to the 3-hr spectrum. The calculated and observed  $m/z$  values for the proton (or sodium) adducts are provided in the table. The structure of the bicyclic product is also shown.

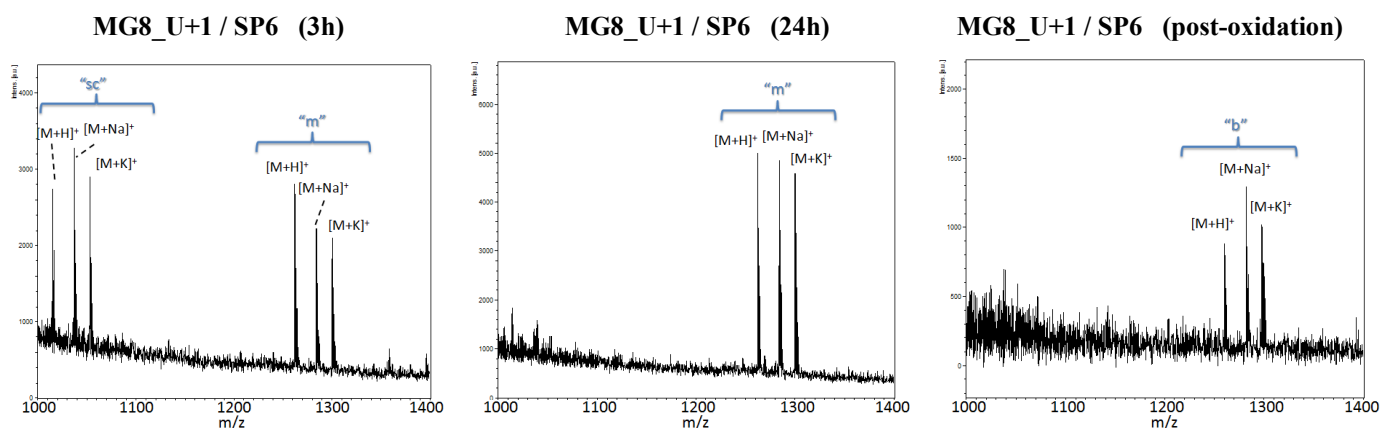

| MG8_U+1 and SP6    | Calc $[M+H]^+$ | Obs $[M+H]^+$ |
|--------------------|----------------|---------------|
| MOrPH ("m")        | 1263.4         | 1262.8        |
| Thiolactone ("sc") | 1016.1         | 1015.7        |
| Bicycle ("b")      | 1261.4         | 1260.7        |

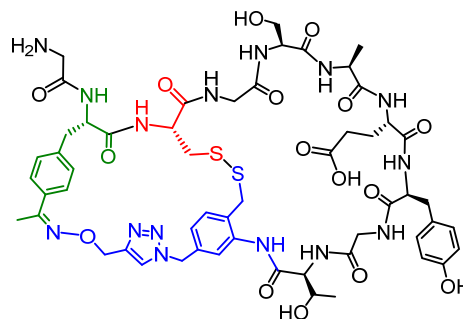

MG8\_U+2 / SP6 (3h)

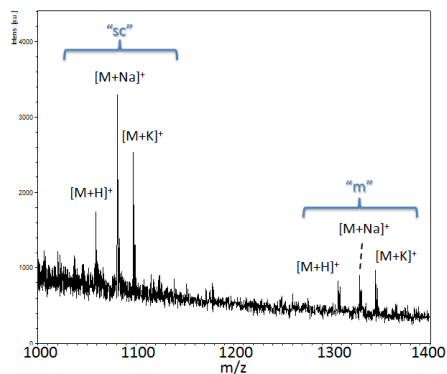

MG8\_U+2 / SP6 (24h)

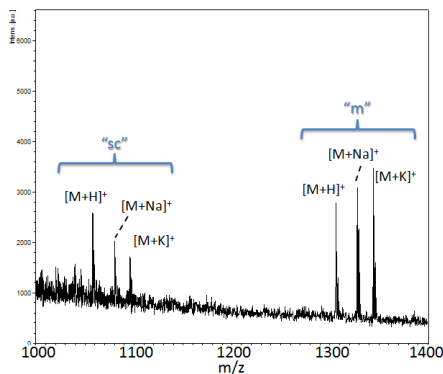

MG8\_U+2 / SP6 (post-oxidation)

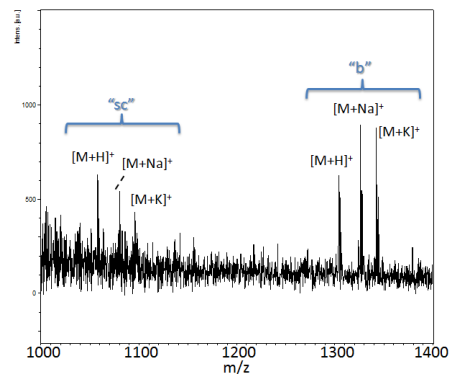

| MG8_U+2 and SP6    | Calc [M+H] <sup>+</sup> | Obs [M+H] <sup>+</sup> |
|--------------------|-------------------------|------------------------|
| MOrPH ("m")        | 1307.5                  | 1306.9                 |
| Thiolactone ("sc") | 1060.2                  | 1059.8                 |
| Bicycle ("b")      | 1305.5                  | 1304.9                 |

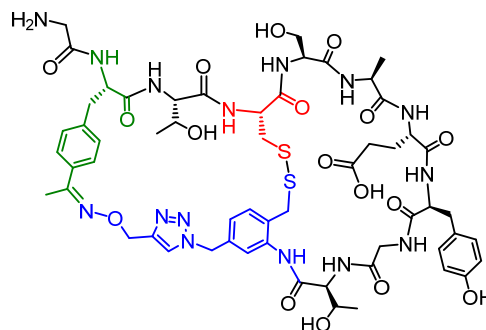

MG8\_U+3 / SP6 (3h)

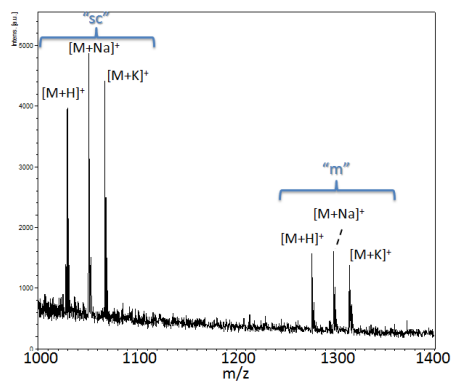

MG8\_U+3 / SP6 (24h)

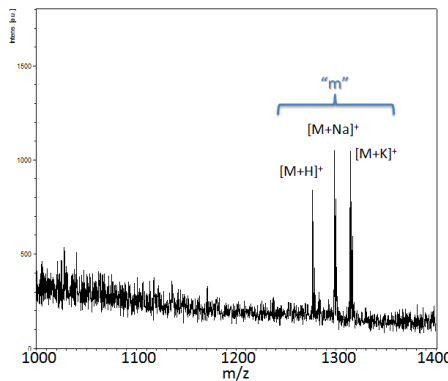

MG8\_U+3 / SP6 (post-oxidation)

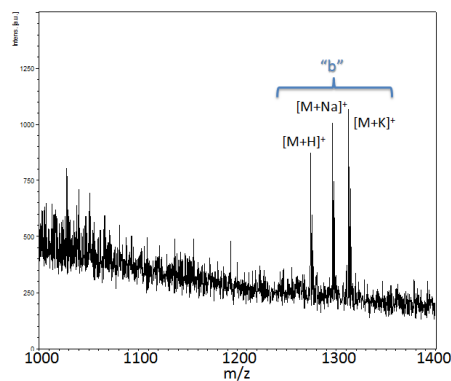

| MG8_U+3 and SP6    | Calc [M+H] <sup>+</sup> | Obs [M+H] <sup>+</sup> |
|--------------------|-------------------------|------------------------|
| MOrPH ("m")        | 1277.5                  | 1276.7                 |
| Thiolactone ("sc") | 1030.2                  | 1029.6                 |
| Bicycle ("b")      | 1275.5                  | 1274.7                 |

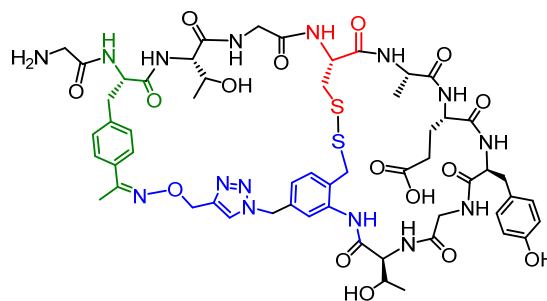

MG8\_U+4 / SP6 (3h)

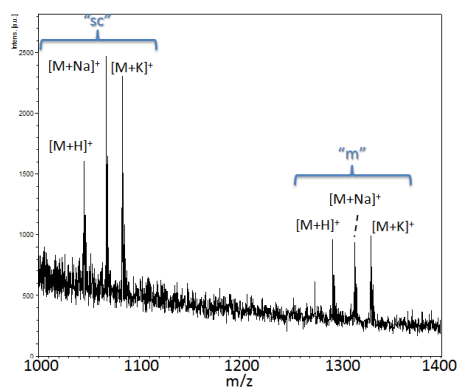

MG8\_U+4 / SP6 (24h)

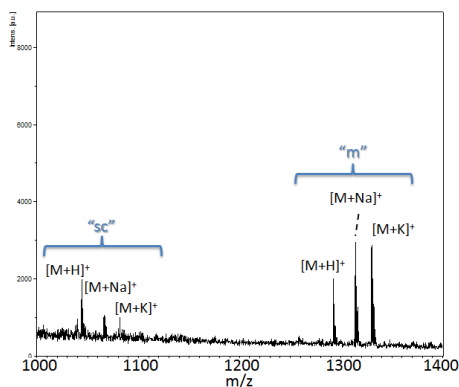

MG8\_U+4 / SP6 (post-oxidation)

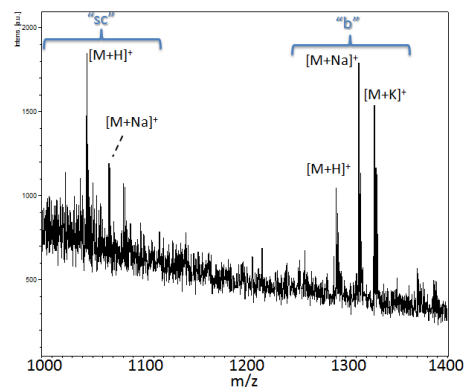

| MG8_U+4 and SP6    | Calc [M+H] <sup>+</sup> | Obs [M+H] <sup>+</sup> |
|--------------------|-------------------------|------------------------|
| MOrPH ("m")        | 1293.5                  | 1292.8                 |
| Thiolactone ("sc") | 1046.2                  | 1045.8                 |
| Bicycle ("b")      | 1291.5                  | 1290.8                 |

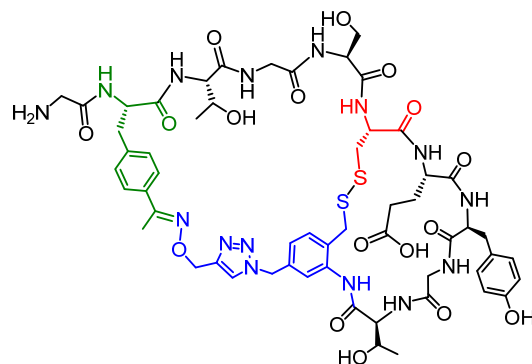

MG8\_U+5 / SP6 (3h)

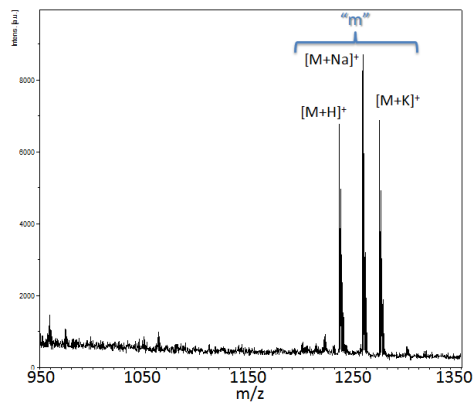

MG8\_U+5 / SP6 (post-oxidation)

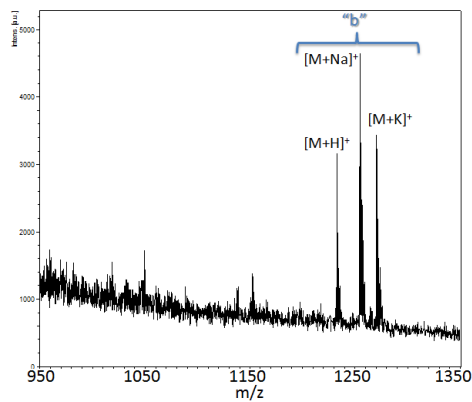

| MG8_U+5 and SP6    | Calc [M+H] <sup>+</sup> | Obs [M+H] <sup>+</sup> |
|--------------------|-------------------------|------------------------|
| MOrPH ("m")        | 1235.4                  | 1234.7                 |
| Thiolactone ("sc") | 988.1                   | not obs.               |
| Bicycle ("b")      | 1233.4                  | 1232.6                 |

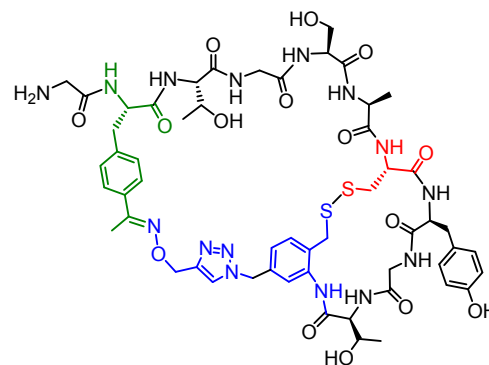

MG8\_U+6 / SP6 (3h)

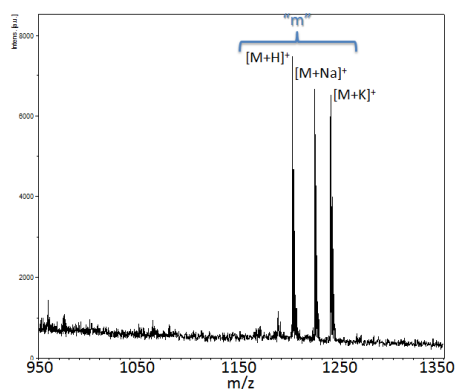

MG8\_U+6 / SP6 (post-oxidation)

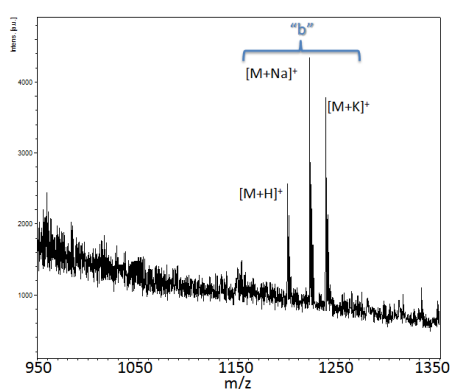

| MG8_U+6 and SP6    | Calc [M+H] <sup>+</sup> | Obs [M+H] <sup>+</sup> |
|--------------------|-------------------------|------------------------|
| MOrPH ("m")        | 1201.4                  | 1200.7                 |
| Thiolactone ("sc") | 954.1                   | not obs.               |
| Bicycle ("b")      | 1199.4                  | 1198.7                 |

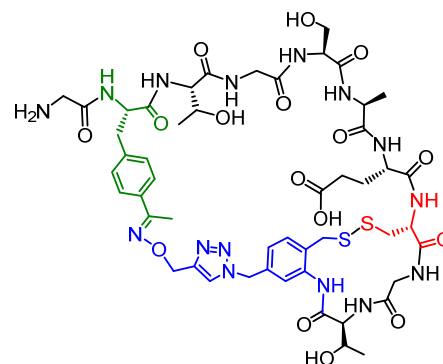

MG8\_U+7 / SP6 (3h)

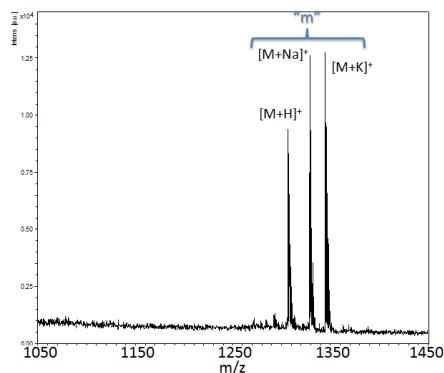

MG8\_U+7 / SP6 (post-oxidation)

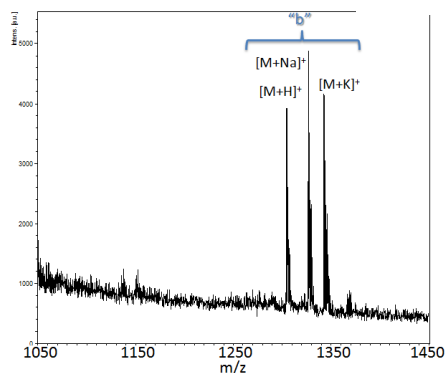

| MG8_U+7 and SP6    | Calc [M+H] <sup>+</sup> | Obs [M+H] <sup>+</sup> |
|--------------------|-------------------------|------------------------|
| MOrPH ("m")        | 1307.5                  | 1306.8                 |
| Thiolactone ("sc") | 1060.2                  | not obs.               |
| Bicycle ("b")      | 1305.5                  | 1304.8                 |

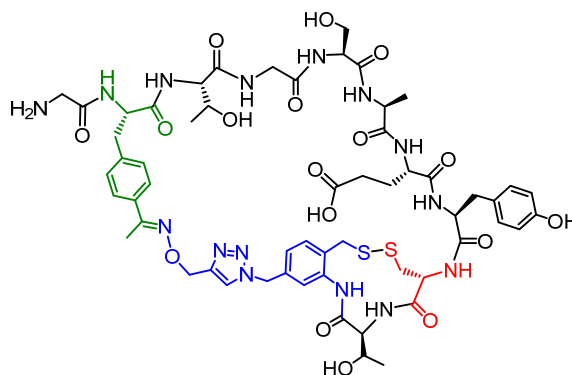

**Supplementary Figure S2.** MALDI-TOF MS analysis of the reactions between **1** (SP6) and the 10mer biosynthetic precursors (MG10 series, Table 1). Spectra correspond to the three hour (*left*) and 24 hour time point (*center*) after addition of **1** and one hour time point after addition of BPDS (*right*). Peaks corresponding to the proton ( $[M+H]^+$ ), sodium ( $[M+Na]^+$ ), and potassium ( $[M+K]^+$ ) adducts of the MOrPH ('m'), self-cyclized thiolactone ('sc') and bicyclic product ('b') are labeled. When no self-cyclized product is formed, the 24 hr-time point spectrum is omitted as it is identical to the 3-hr spectrum. The calculated and observed  $m/z$  values for the proton (or sodium) adducts are provided in the table. The structure of the bicyclic product is also shown.

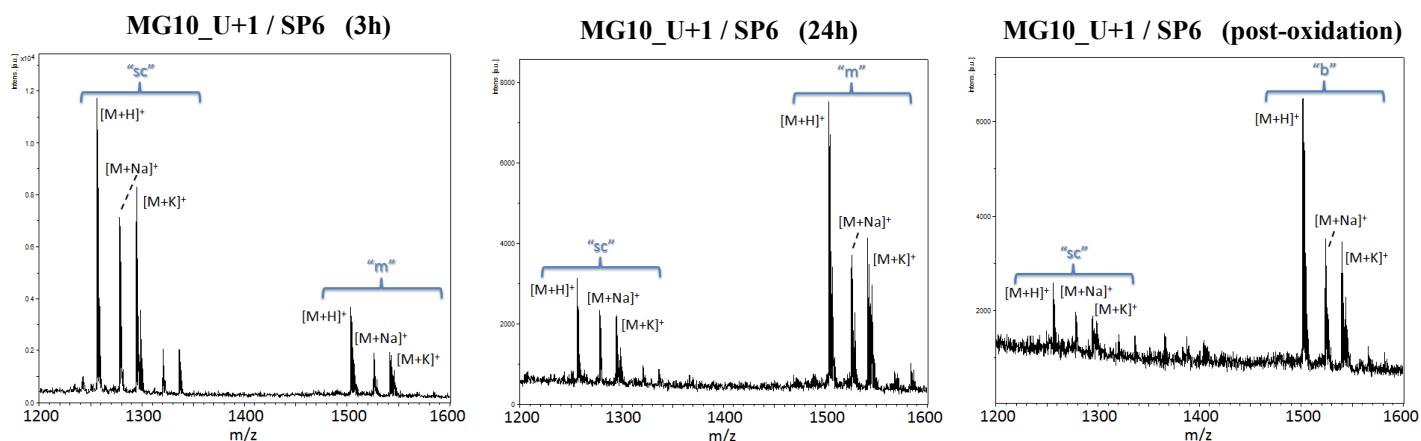

| MG10_U+1 and SP6   | Calc $[M+H]^+$ | Obs $[M+H]^+$ |
|--------------------|----------------|---------------|
| MOrPH ("m")        | 1504.6         | 1504.1        |
| Thiolactone ("sc") | 1257.3         | 1256.9        |
| Bicycle ("b")      | 1502.6         | 1502.1        |

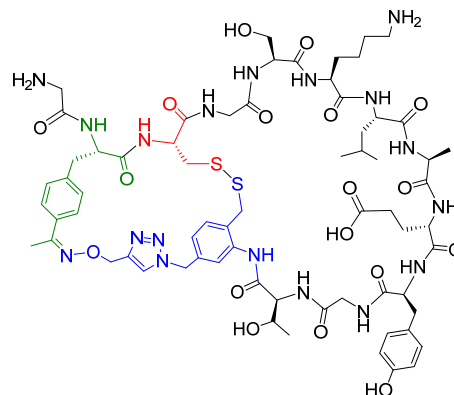

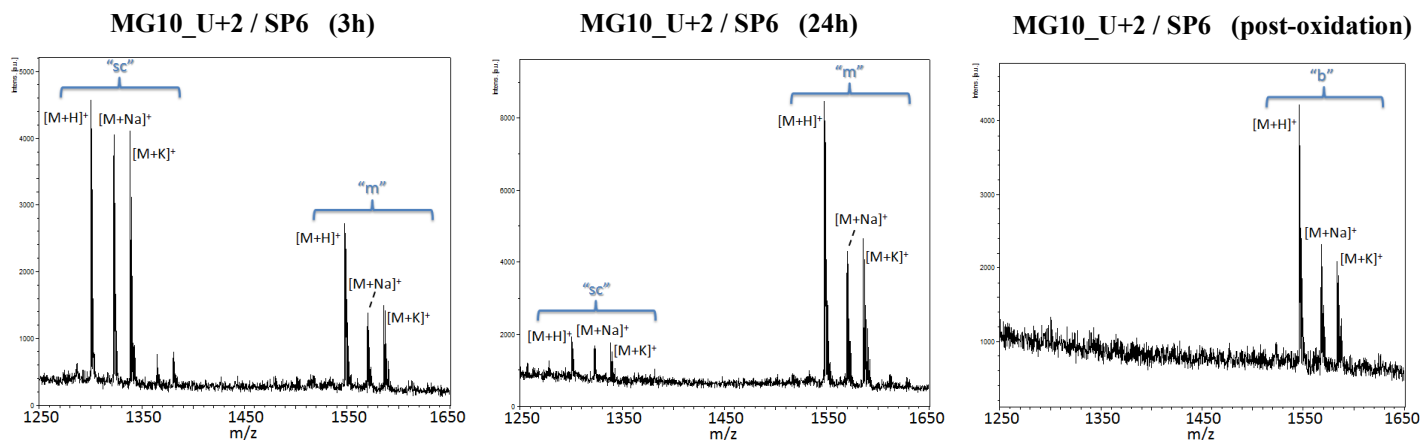

| MG10_U+2 and SP6   | Calc $[M+H]^+$ | Obs $[M+H]^+$ |
|--------------------|----------------|---------------|
| MOrPH ("m")        | 1504.6         | 1503.9        |
| Thiolactone ("sc") | 1257.3         | 1256.8        |
| Bicycle ("b")      | 1502.6         | 1501.9        |

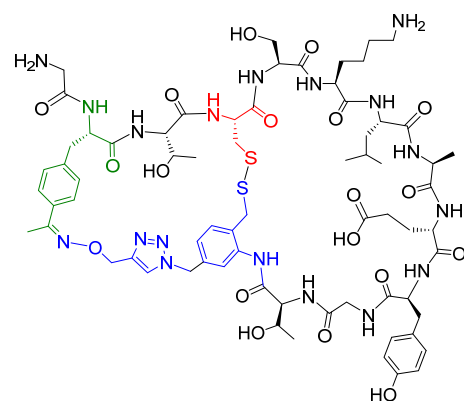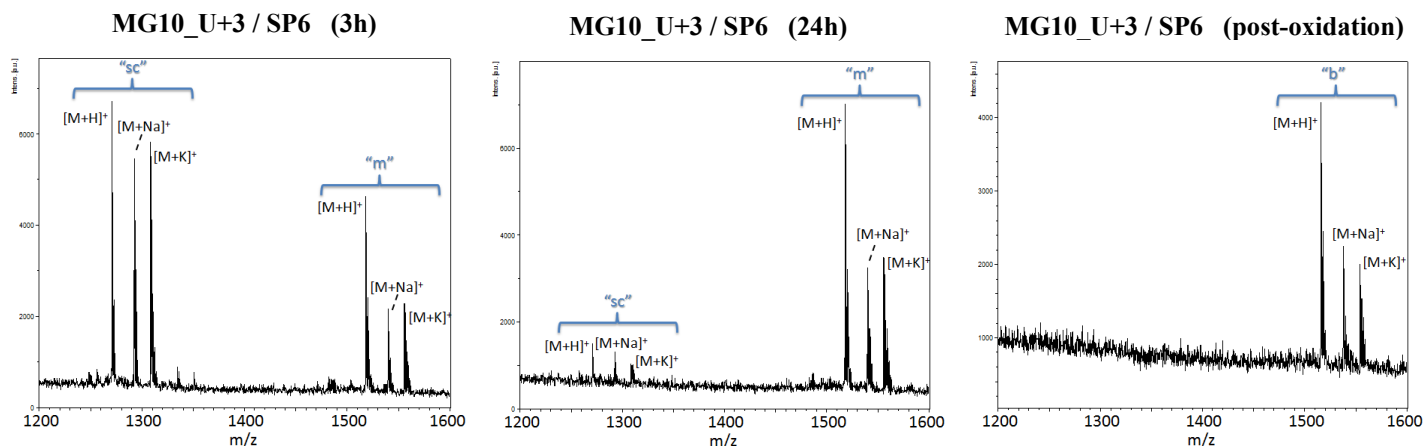

| MG10_U+3 and SP6   | Calc $[M+H]^+$ | Obs $[M+H]^+$ |
|--------------------|----------------|---------------|
| MOrPH ("m")        | 1518.7         | 1517.9        |
| Thiolactone ("sc") | 1271.4         | 1270.8        |
| Bicycle ("b")      | 1516.7         | 1515.9        |

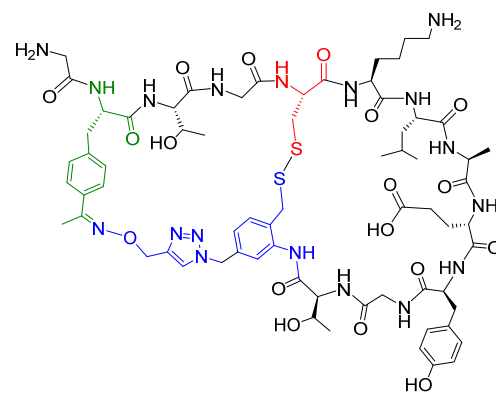



MG10\_U+4 / SP6 (3h)

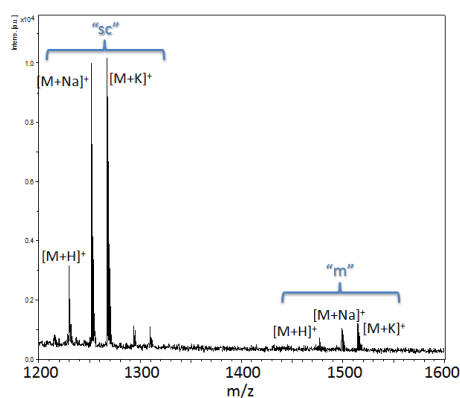

MG10\_U+4 / SP6 (24h)

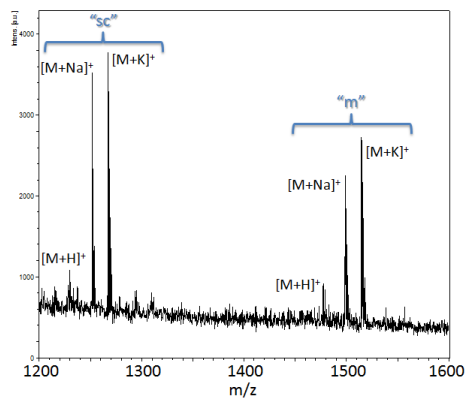

MG10\_U+4 / SP6 (post-oxidation)

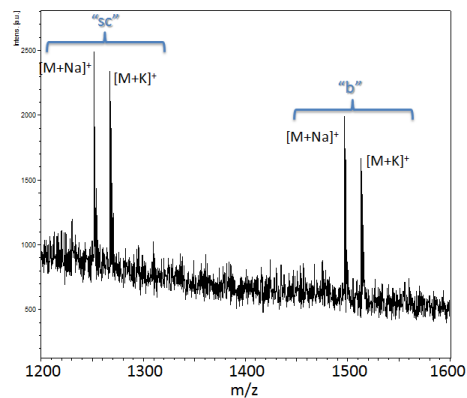

| MG10_U+4 and SP6   | Calc [M+Na] <sup>+</sup> | Obs [M+Na] <sup>+</sup> |
|--------------------|--------------------------|-------------------------|
| MOrPH ("m")        | 1499.7                   | 1498.9                  |
| Thiolactone ("sc") | 1252.4                   | 1251.8                  |
| Bicycle ("b")      | 1497.7                   | 1496.9                  |

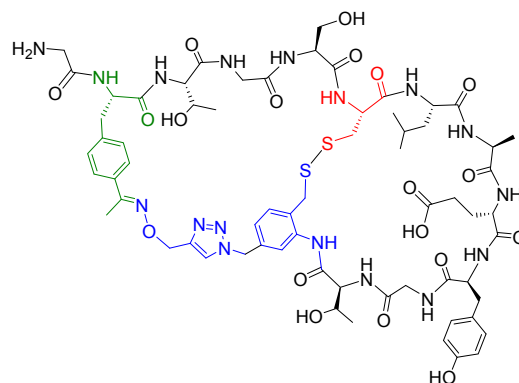

MG10\_U+5 / SP6 (3h)

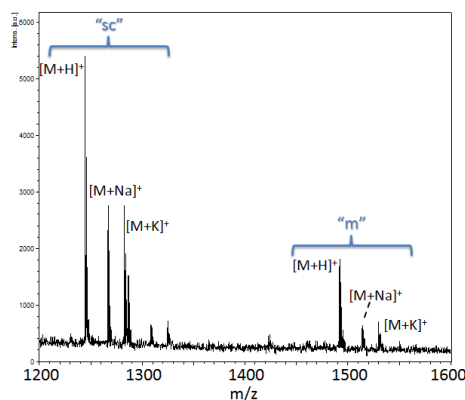

MG10\_U+5 / SP6 (24h)

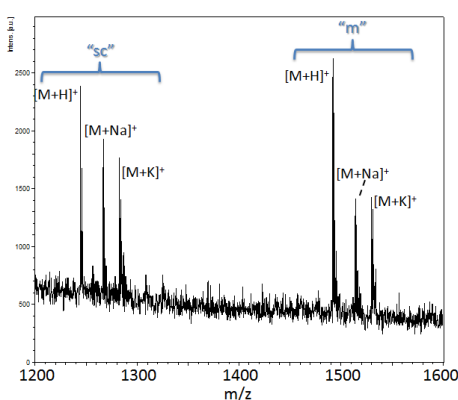

MG10\_U+5 / SP6 (post-oxidation)

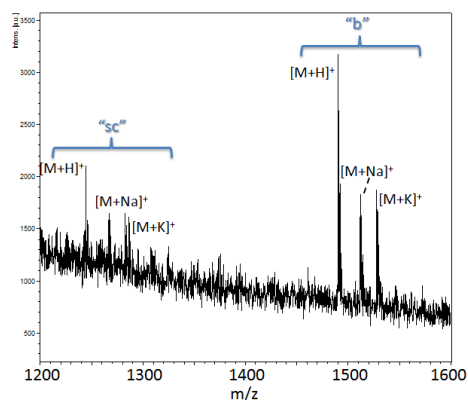

| MG10_U+5 and SP6   | Calc [M+H] <sup>+</sup> | Obs [M+H] <sup>+</sup> |
|--------------------|-------------------------|------------------------|
| MOrPH ("m")        | 1492.7                  | 1492.0                 |
| Thiolactone ("sc") | 1245.4                  | 1244.8                 |
| Bicycle ("b")      | 1490.7                  | 1489.9                 |

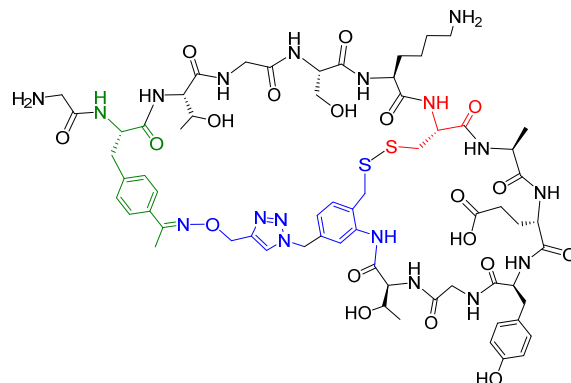

MG10\_U+6 / SP6 (3h)

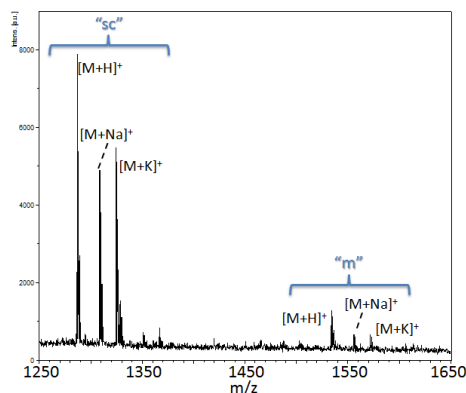

MG10\_U+6 / SP6 (24h)

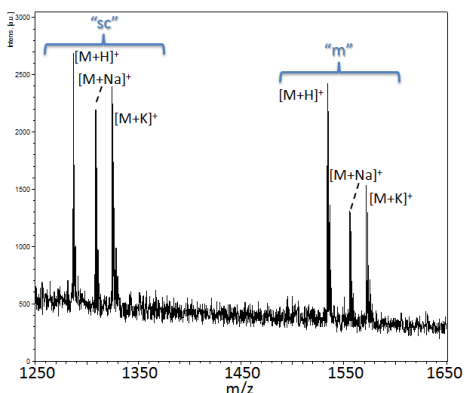

MG10\_U+6 / SP6 (post-oxidation)

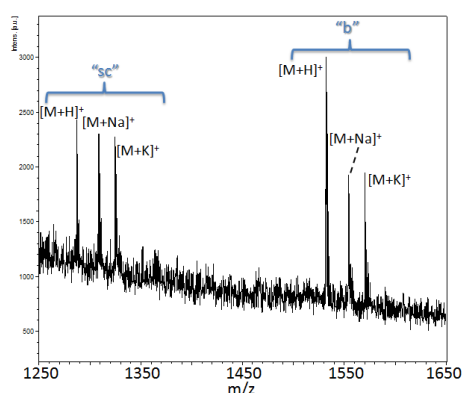

| MG10_U+6 and SP6   | Calc [M+H] <sup>+</sup> | Obs [M+H] <sup>+</sup> |
|--------------------|-------------------------|------------------------|
| MOrPH ("m")        | 1534.8                  | 1534.1                 |
| Thiolactone ("sc") | 1287.5                  | 1286.9                 |
| Bicycle ("b")      | 1532.8                  | 1532.1                 |

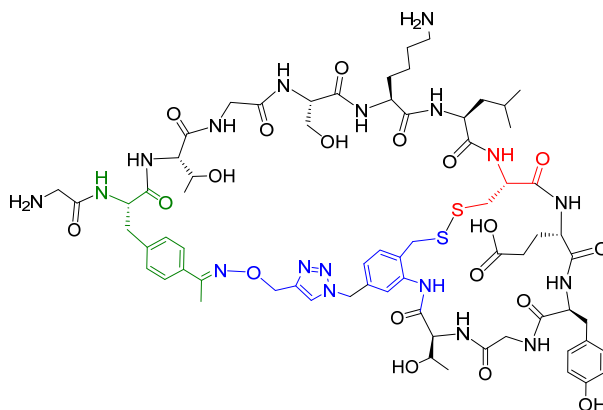

MG10\_U+7 / SP6 (3h)

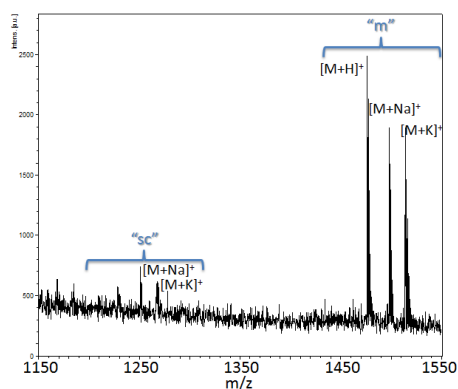

MG10\_U+7 / SP6 (post-oxidation)

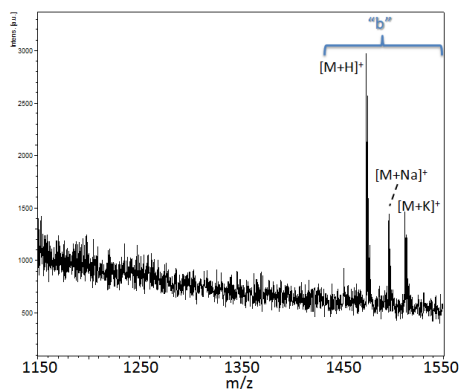

| MG10_U+7 and SP6   | Calc [M+Na] <sup>+</sup> | Obs [M+Na] <sup>+</sup> |
|--------------------|--------------------------|-------------------------|
| MOrPH ("m")        | 1498.8                   | 1498.1                  |
| Thiolactone ("sc") | 1251.5                   | 1250.9                  |
| Bicycle ("b")      | 1496.8                   | 1496.1                  |

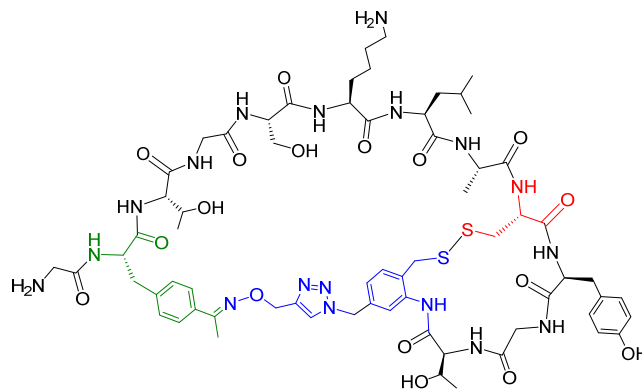

MG10\_U+8 / SP6 (3h)

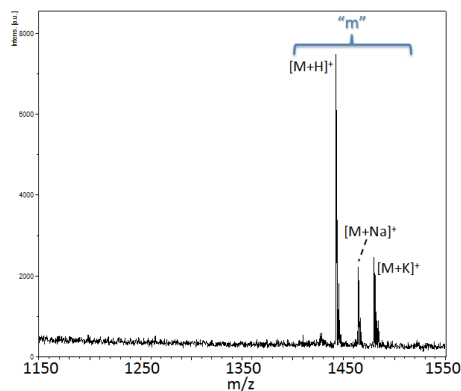

MG10\_U+8 / SP6 (post-oxidation)

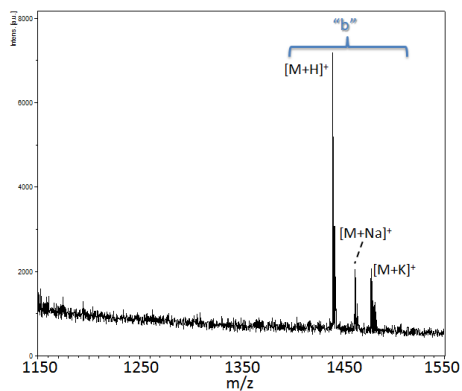

| MG10_U+8 and SP6   | Calc [M+H] <sup>+</sup> | Obs [M+H] <sup>+</sup> |
|--------------------|-------------------------|------------------------|
| MOrPH ("m")        | 1442.7                  | 1442.1                 |
| Thiolactone ("sc") | 1195.4                  | n/o                    |
| Bicycle ("b")      | 1440.7                  | 1440.1                 |

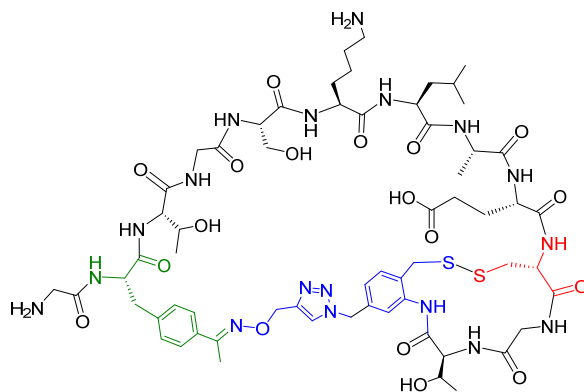

MG10\_U+9 / SP6 (3h)

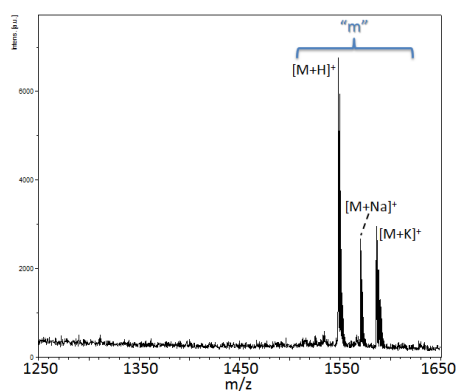

MG10\_U+9 / SP6 (post-oxidation)

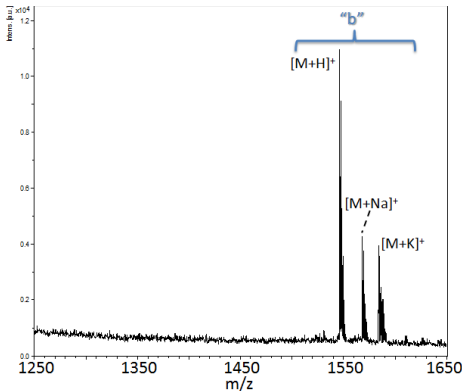

| MG10_U+9 and SP6   | Calc [M+H] <sup>+</sup> | Obs [M+H] <sup>+</sup> |
|--------------------|-------------------------|------------------------|
| MOrPH ("m")        | 1548.8                  | 1548.2                 |
| Thiolactone ("sc") | 1301.5                  | n/o                    |
| Bicycle ("b")      | 1546.8                  | 1546.2                 |

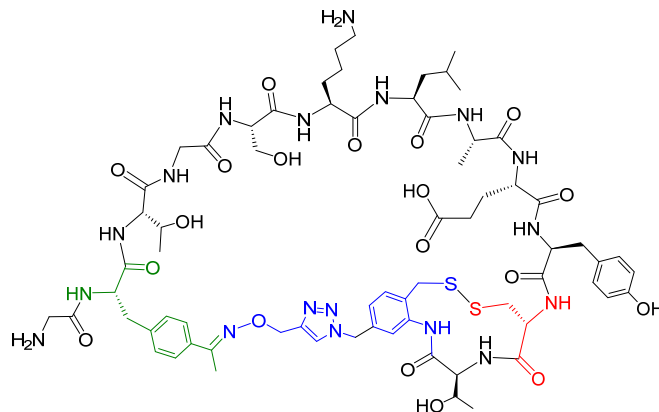

**Supplementary Figure S3.** MALDI-TOF MS analysis of the reactions between **2** (SP4) and the 8mer biosynthetic precursors (MG8 series, Table 1). Spectra correspond to the three hour (*left*) and 24 hour time point (*center*) after addition of **1** and one hour time point after addition of BPDS (*right*). Peaks corresponding to the proton ( $[M+H]^+$ ), sodium ( $[M+Na]^+$ ), and potassium ( $[M+K]^+$ ) adducts of the MOrPH ('m'), self-cyclized thiolactone ('sc') and bicyclic product ('b') are labeled. When no self-cyclized product is formed, the 24 hr-time point spectrum is omitted as it is identical to the 3-hr spectrum. The calculated and observed  $m/z$  values for the proton (or sodium) adducts are provided in the table. The structure of the bicyclic product is also shown.

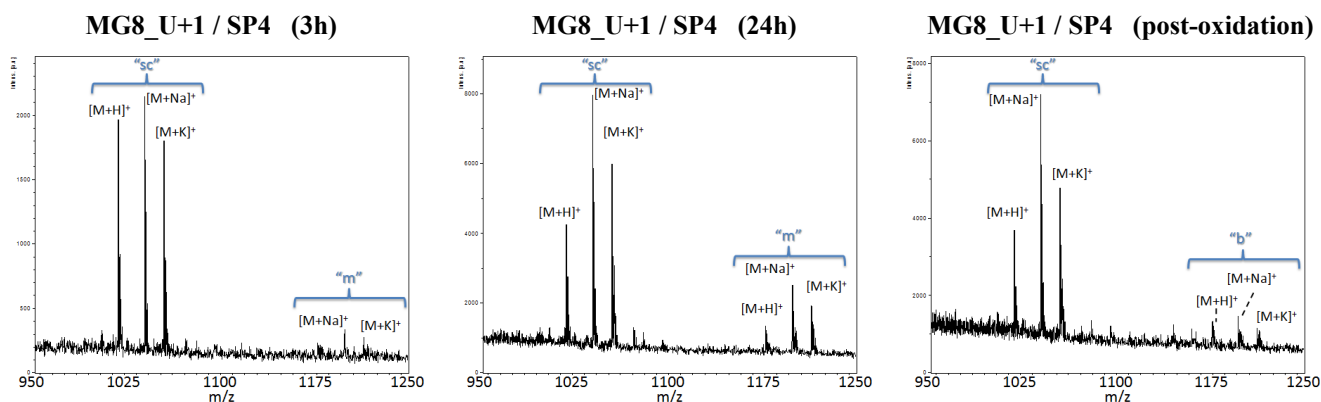

| MG8_U+1 and SP4    | Calc $[M+H]^+$ | Obs $[M+H]^+$ |
|--------------------|----------------|---------------|
| MOrPH ("m")        | 1182.4         | 1181.6        |
| Thiolactone ("sc") | 1016.1         | 1015.6        |
| Bicycle ("b")      | 1180.4         | 1179.8        |

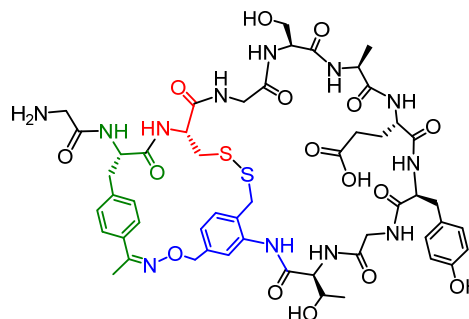

MG8\_U+2 / SP4 (3h)

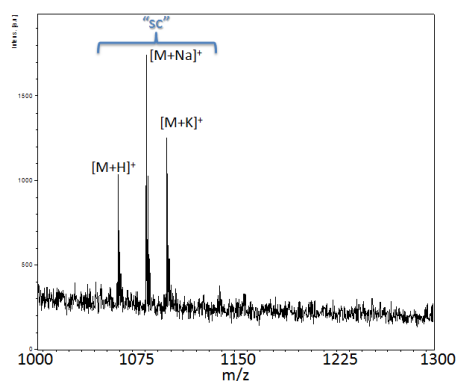

MG8\_U+2 / SP4 (3h)

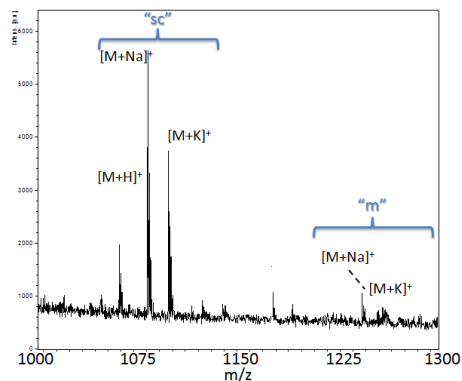

MG8\_U+2 / SP4 (post-oxidation)

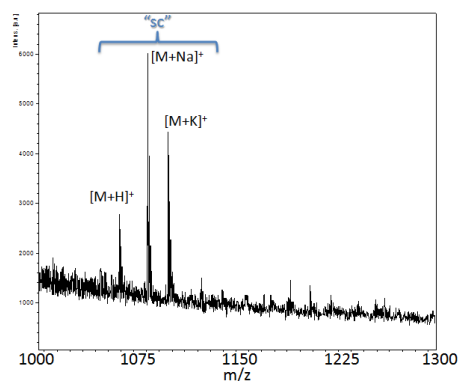

| MG8_U+2 and SP4    | Calc [M+Na] <sup>+</sup> | Obs [M+Na] <sup>+</sup> |
|--------------------|--------------------------|-------------------------|
| MOrPH ("m")        | 1248.5                   | 1247.6                  |
| Thiolactone ("sc") | 1082.2                   | 1081.5                  |
| Bicycle ("b")      | 1246.5                   | n/o                     |

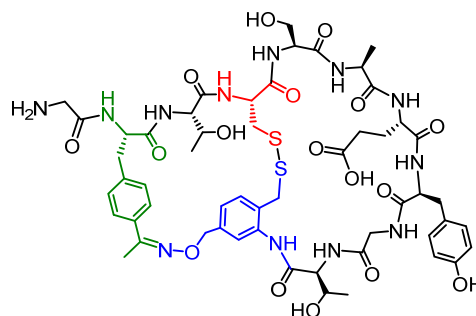

MG8\_U+3 / SP4 (3h)

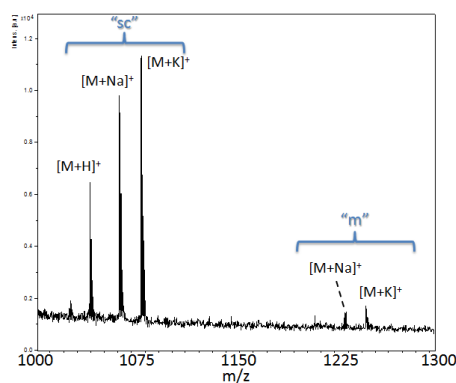

MG8\_U+3 / SP4 (24h)

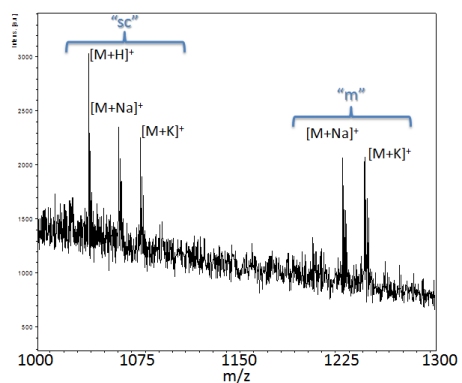

MG8\_U+3 / SP4 (post-oxidation)

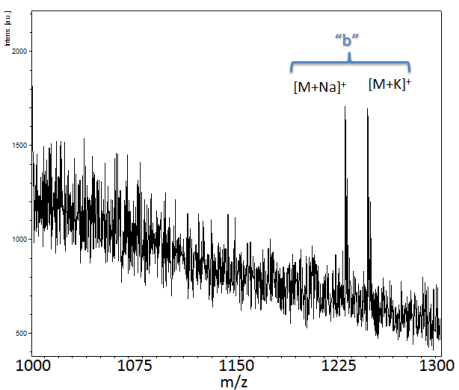

| MG8_U+3 and SP4    | Calc [M+Na] <sup>+</sup> | Obs [M+Na] <sup>+</sup> |
|--------------------|--------------------------|-------------------------|
| MOrPH ("m")        | 1218.5                   | 1217.8                  |
| Thiolactone ("sc") | 1032.2                   | 1051.7                  |
| Bicycle ("b")      | 1216.5                   | 1215.8                  |

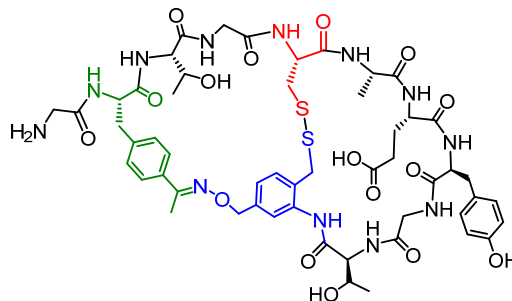

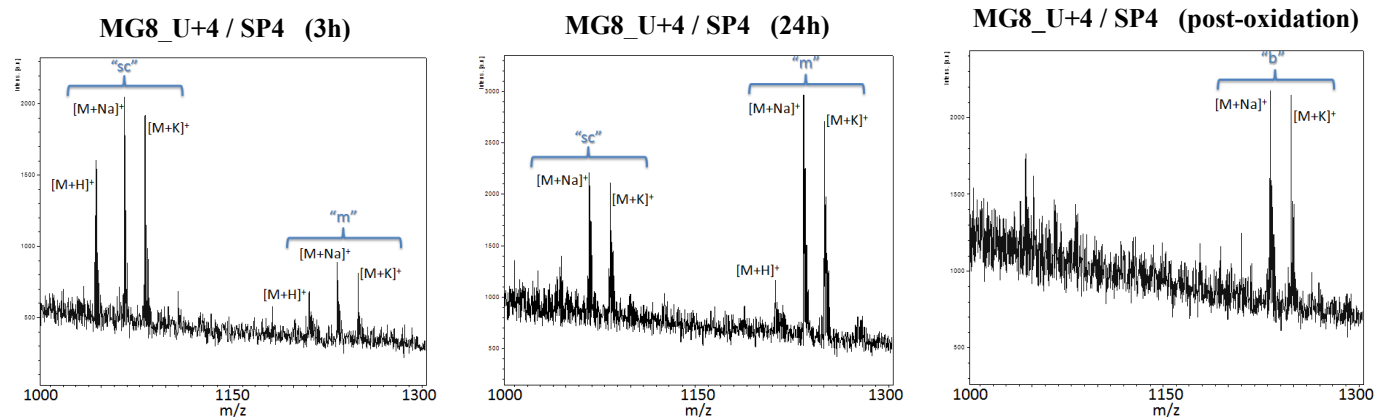

| MG8_U+4 and SP4    | Calc [M+Na] <sup>+</sup> | Obs [M+Na] <sup>+</sup> |
|--------------------|--------------------------|-------------------------|
| MOrPH ("m")        | 1234.5                   | 1234.3                  |
| Thiolactone ("sc") | 1068.2                   | 1068.1                  |
| Bicycle ("b")      | 1232.5                   | 1232.2                  |

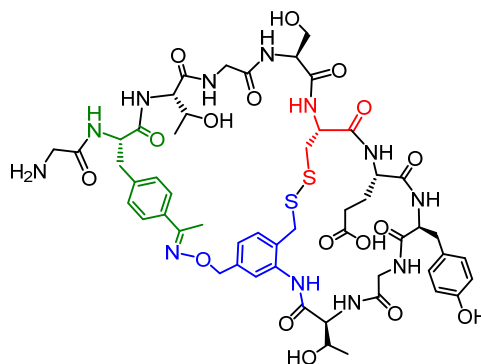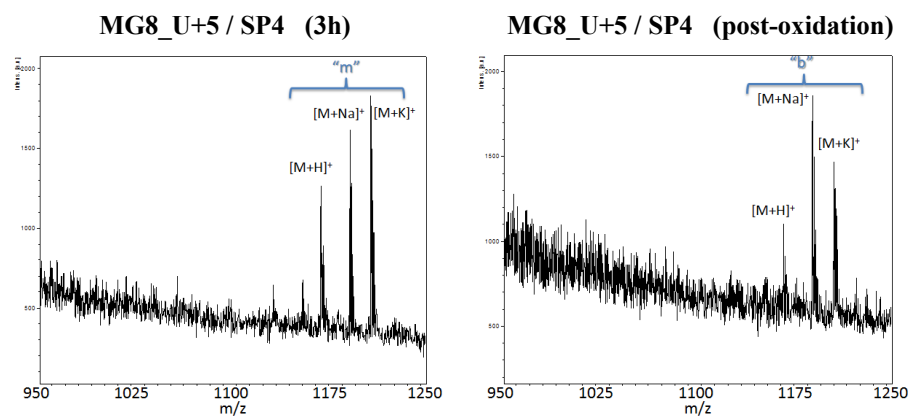

| MG8_U+5 and SP4    | Calc [M+H] <sup>+</sup> | Obs [M+H] <sup>+</sup> |
|--------------------|-------------------------|------------------------|
| MOrPH "m"          | 1154.4                  | 1154.4                 |
| Thiolactone "sc"   | 988.1                   | n/o                    |
| Bicyclic MOrPH "b" | 1152.4                  | 1152.5                 |

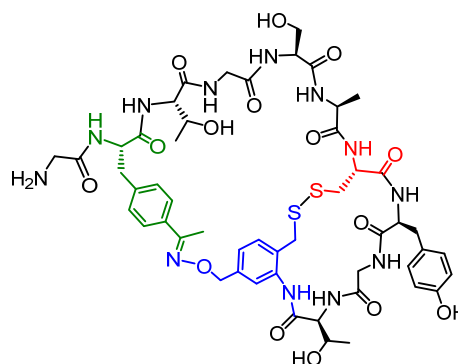

MG8\_U+6 / SP4 (3h)

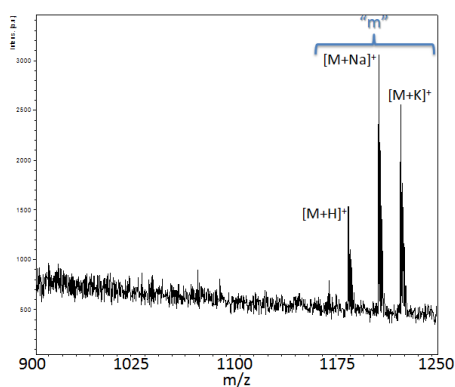

MG8\_U+6 / SP4 (post-oxidation)

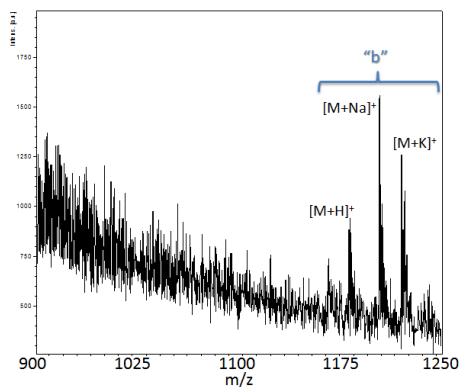

| MG8_U+6 and SP4    | Calc $[M+H]^+$ | Obs $[M+H]^+$ |
|--------------------|----------------|---------------|
| MOrPH ("m")        | 1120.4         | 1120.4        |
| Thiolactone ("sc") | 954.1          | n/o           |
| Bicycle ("b")      | 1118.4         | 1118.2        |

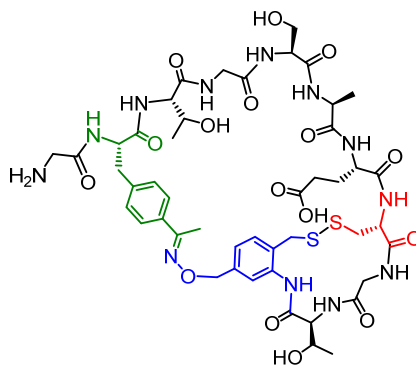

MG8\_U+7 / SP4 (3h)

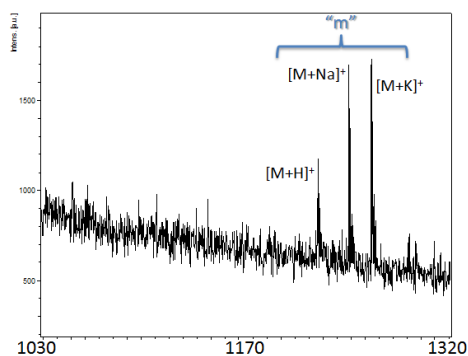

MG8\_U+7 / SP4 (post-oxidation)

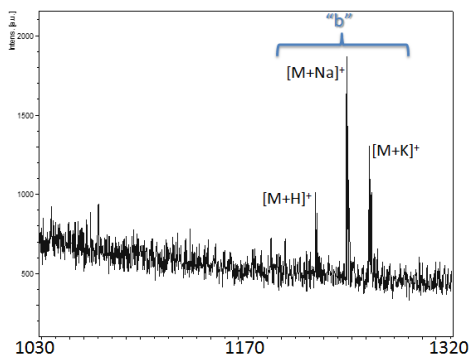

| MG8_U+7 and SP4    | Calc $[M+H]^+$ | Obs $[M+H]^+$ |
|--------------------|----------------|---------------|
| MOrPH ("m")        | 1226.5         | 1226.0        |
| Thiolactone ("sc") | 1060.2         | n/o           |
| Bicycle ("b")      | 1224.5         | 1224.1        |

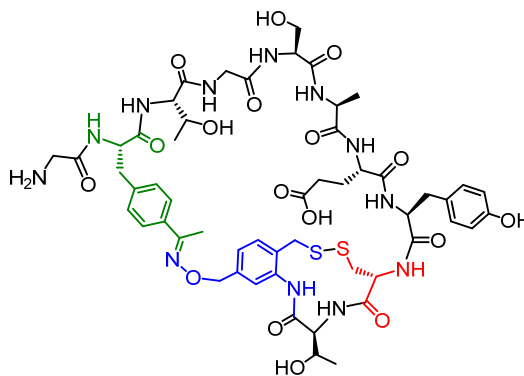

**Supplementary Figure S4.** MALDI-TOF MS analysis of the reactions between **2** (SP4) and the 10mer biosynthetic precursors (MG10 series, Table 1). Spectra correspond to the three hour (*left*) and 24 hour time point (*center*) after addition of **1** and one hour time point after addition of BPDS (*right*). Peaks corresponding to the proton ( $[M+H]^+$ ), sodium ( $[M+Na]^+$ ), and potassium ( $[M+K]^+$ ) adducts of the MOrPH ('m'), self-cyclized thiolactone ('sc') and bicyclic product ('b') are labeled. When no self-cyclized product is formed, the 24 hr-time point spectrum is omitted as it is identical to the 3-hr spectrum. The calculated and observed  $m/z$  values for the proton (or sodium) adducts are provided in the table. The structure of the bicyclic product is also shown.

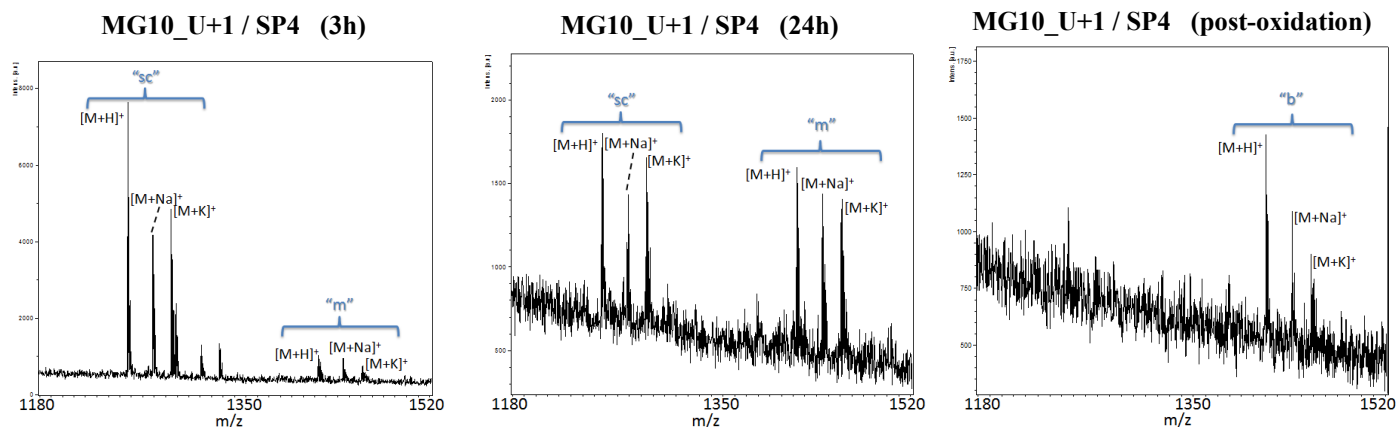

| MG10_U+1 and SP4   | Calc $[M+H]^+$ | Obs $[M+H]^+$ |
|--------------------|----------------|---------------|
| MOrPH ("m")        | 1423.6         | 1422.9        |
| Thiolactone ("sc") | 1257.3         | 1256.8        |
| Bicycle ("b")      | 1421.6         | 1420.9        |

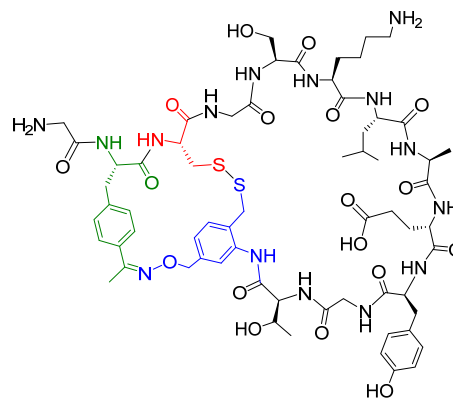



MG10\_U+2 / SP4 (3h)

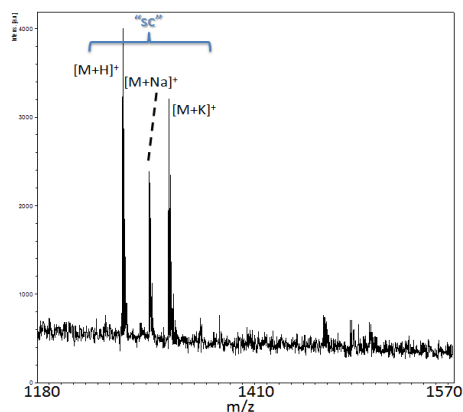

MG10\_U+2 / SP4 (24h)

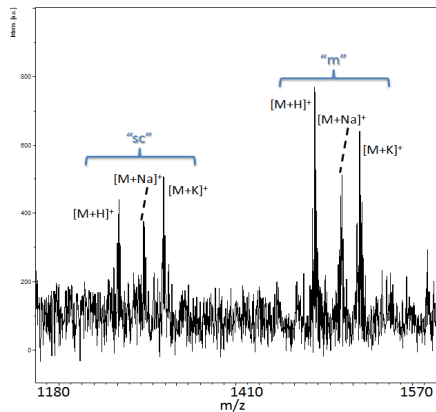

MG10\_U+2 / SP4 (post-oxidation)

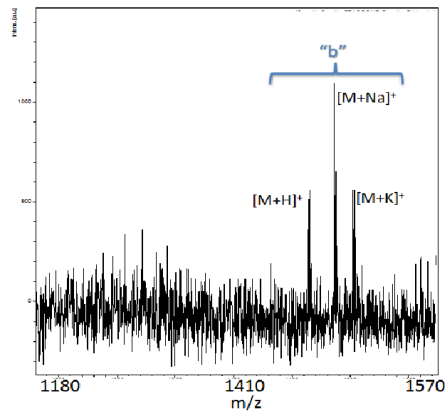

| MG10_U+2 and SP4   | Calc [M+H] <sup>+</sup> | Obs [M+H] <sup>+</sup> |
|--------------------|-------------------------|------------------------|
| MOrPH ("m")        | 1466.7                  | 1467.1                 |
| Thiolactone ("sc") | 1300.4                  | 1300.9                 |
| Bicycle ("b")      | 1464.7                  | 1465.0                 |

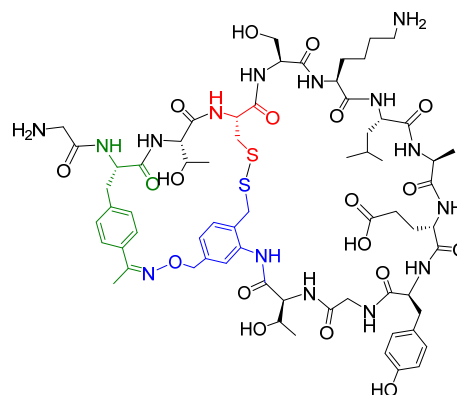

MG10\_U+3 / SP4 (3h)

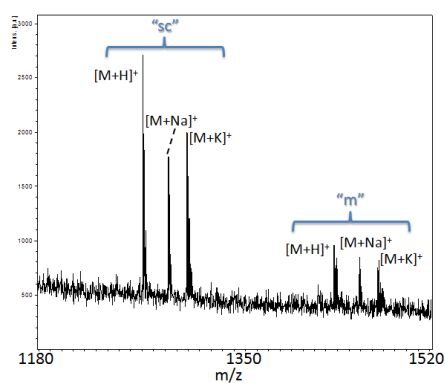

MG10\_U+3 / SP4 (24h)

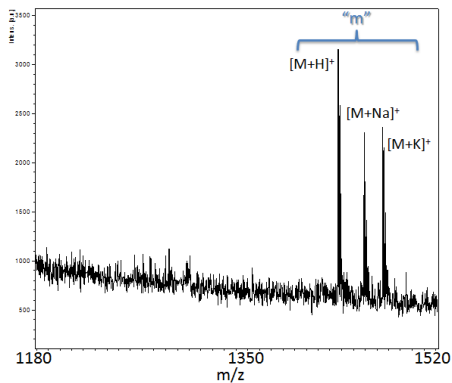

MG10\_U+3 / SP4 (post-oxidation)

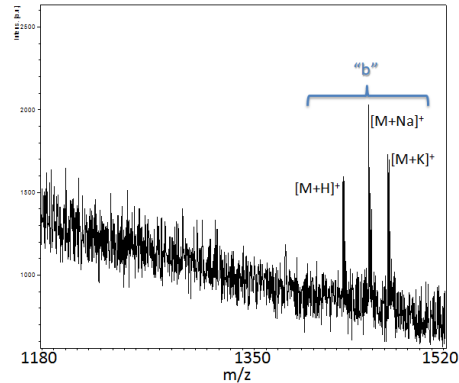

| MG10_U+3 and SP4   | Calc [M+H] <sup>+</sup> | Obs [M+H] <sup>+</sup> |
|--------------------|-------------------------|------------------------|
| MOrPH ("m")        | 1437.7                  | 1437.1                 |
| Thiolactone ("sc") | 1271.4                  | 1271.0                 |
| Bicycle ("b")      | 1435.7                  | 1435.0                 |

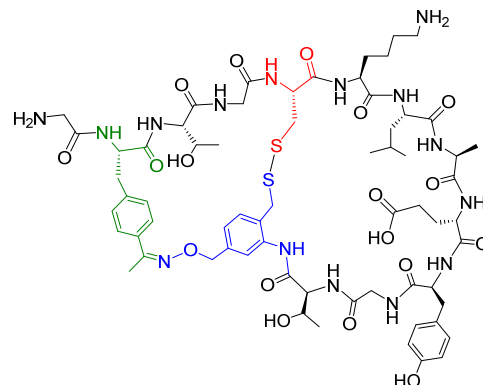

MG10\_U+4 / SP4 (3h)

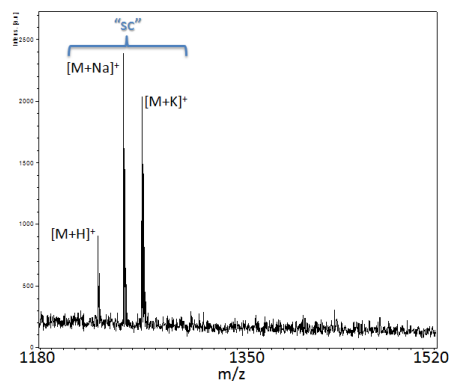

MG10\_U+4 / SP4 (24h)

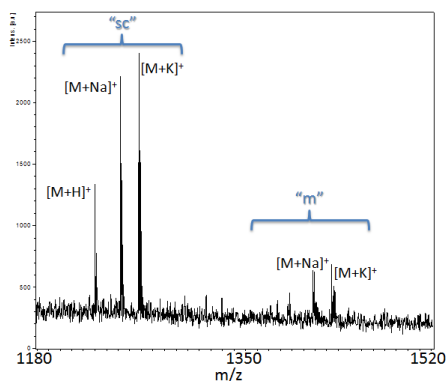

MG10\_U+4 / SP4 (post-oxidation)

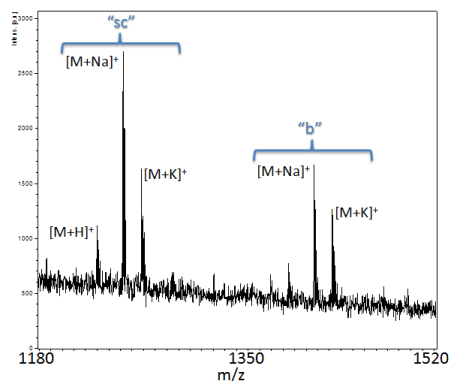

| MG10_U+4 and SP4   | Calc [M+H] <sup>+</sup> | Obs [M+H] <sup>+</sup> |
|--------------------|-------------------------|------------------------|
| MOrPH ("m")        | 1396.7                  | 1396.7                 |
| Thiolactone ("sc") | 1230.4                  | 1230.6                 |
| Bicycle ("b")      | 1394.7                  | 1394.9                 |

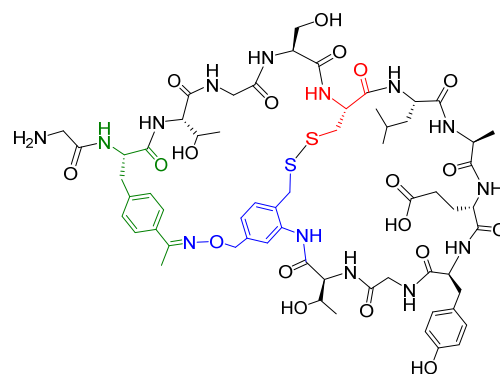

MG10\_U+5 / SP4 (3h)

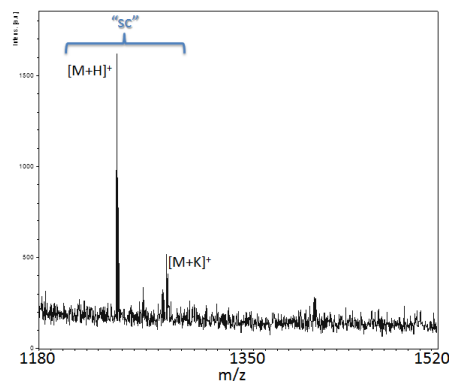

MG10\_U+5 / SP4 (24h)

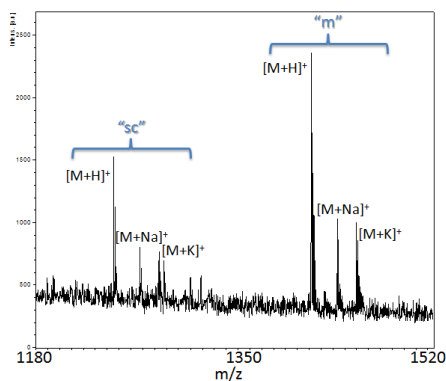

MG10\_U+5 / SP4 (post-oxidation)

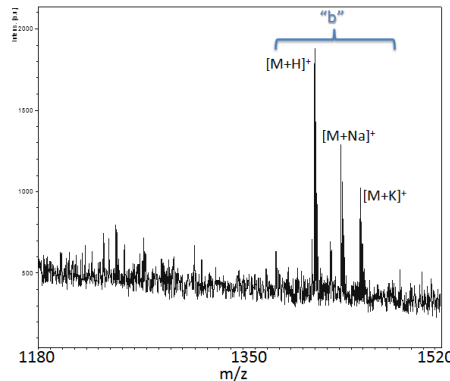

| MG10_U+5 and SP4   | Calc [M+H] <sup>+</sup> | Obs [M+H] <sup>+</sup> |
|--------------------|-------------------------|------------------------|
| MOrPH ("m")        | 1410.7                  | 1411.4                 |
| Thiolactone ("sc") | 1244.4                  | 1245.2                 |
| Bicycle ("b")      | 1408.7                  | 1409.3                 |

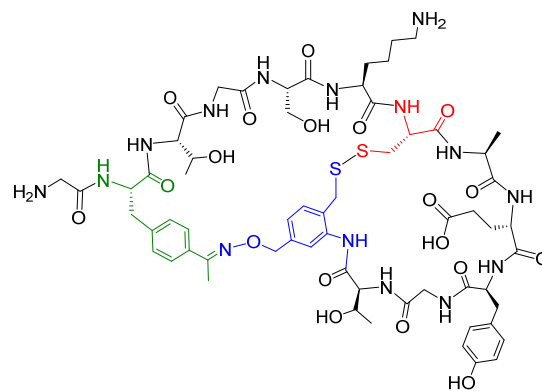

MG10\_U+6 / SP4 (3h)

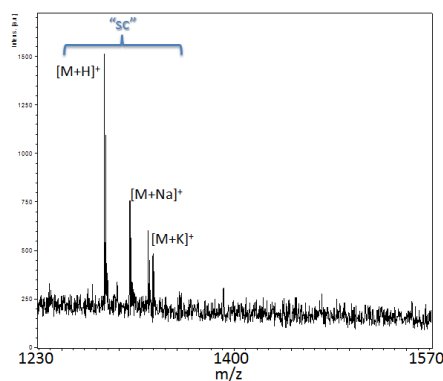

MG10\_U+6 / SP4 (24h)

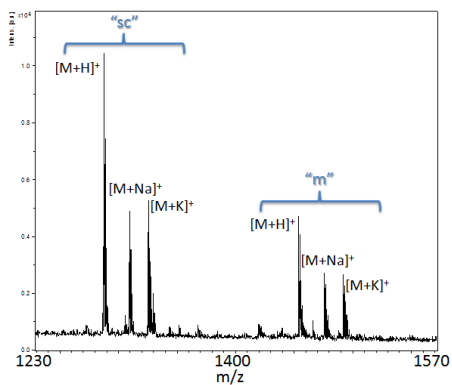

MG10\_U+6 / SP4 (post-oxidation)

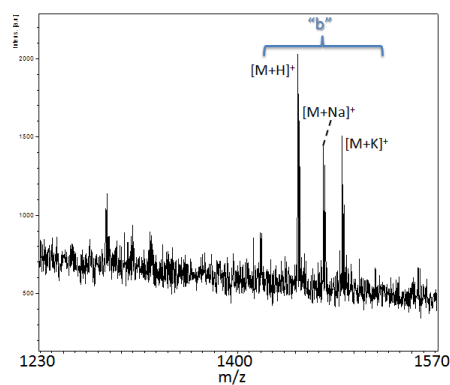

| MG10_U+6 and SP4   | Calc [M+H] <sup>+</sup> | Obs [M+H] <sup>+</sup> |
|--------------------|-------------------------|------------------------|
| MOrPH ("m")        | 1453.8                  | 1453.9                 |
| Thiolactone ("sc") | 1287.5                  | 1287.7                 |
| Bicycle ("b")      | 1451.8                  | 1451.9                 |

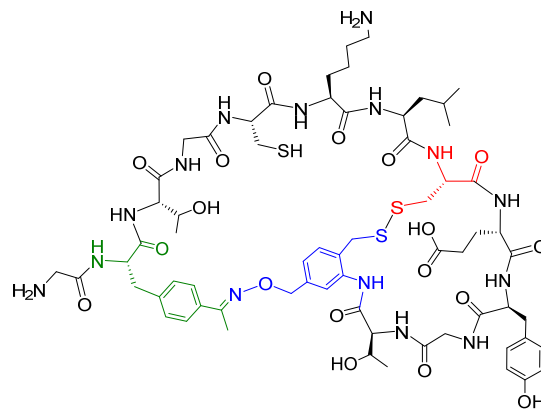

MG10\_U+7 / SP4 (3h)

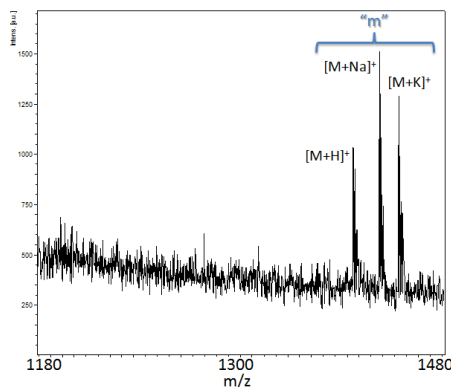

MG10\_U+7 / SP4 (post-oxidation)

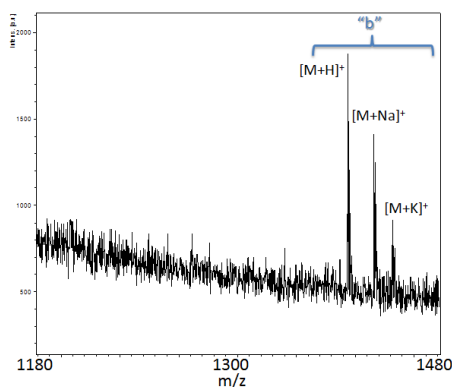

| MG10_U+7 and SP4   | Calc [M+H] <sup>+</sup> | Obs [M+H] <sup>+</sup> |
|--------------------|-------------------------|------------------------|
| MOrPH ("m")        | 1395.8                  | 1395.9                 |
| Thiolactone ("sc") | 1229.5                  | 1287.7                 |
| Bicycle ("b")      | 1393.8                  | 1393.9                 |

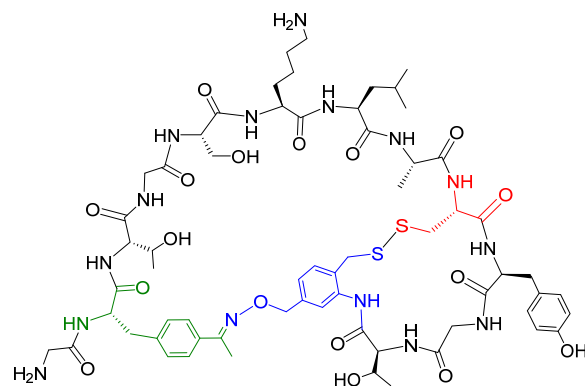

MG10\_U+8 / SP4 (3h)

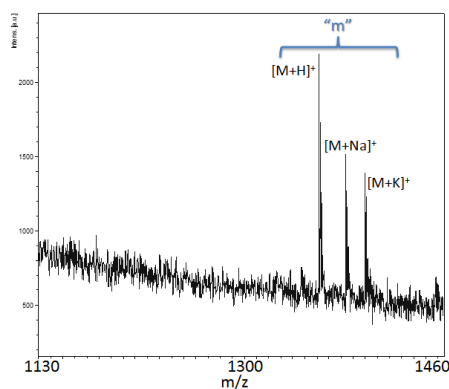

MG10\_U+8 / SP4 (post-oxidation)

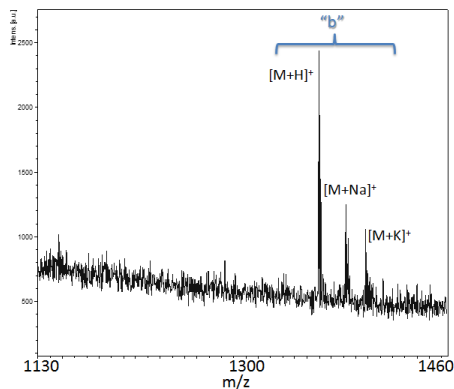

| MG10_U+8 and SP4   | Calc [M+H] <sup>+</sup> | Obs [M+H] <sup>+</sup> |
|--------------------|-------------------------|------------------------|
| MOrPH ("m")        | 1361.6                  | 1361.9                 |
| Thiolactone ("sc") | 1195.3                  | n/o                    |
| Bicycle ("b")      | 1359.6                  | 1359.8                 |

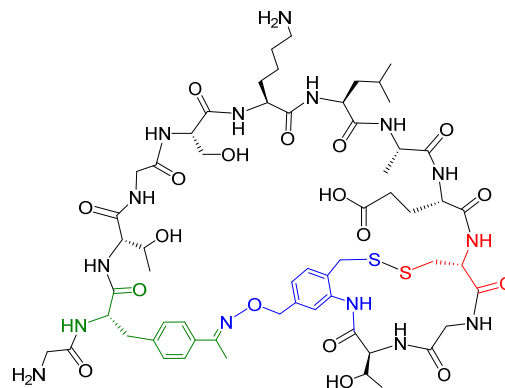

MG10\_U+9 / SP4 (3h)

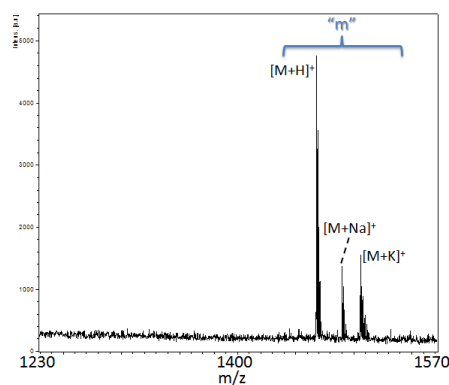

MG10\_U+9 / SP4 (post-oxidation)

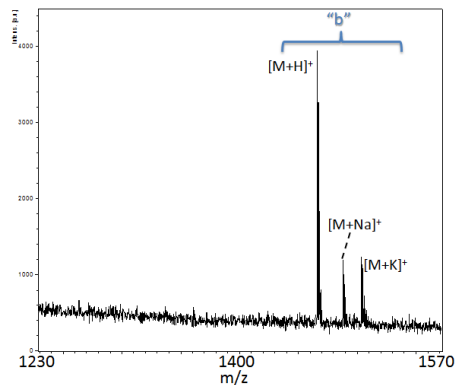

| MG10_U+9 and SP4   | Calc [M+H] <sup>+</sup> | Obs [M+H] <sup>+</sup> |
|--------------------|-------------------------|------------------------|
| MOrPH ("m")        | 1467.8                  | 1467.6                 |
| Thiolactone ("sc") | 1301.5                  | n/o                    |
| Bicycle ("b")      | 1465.8                  | 1465.5                 |

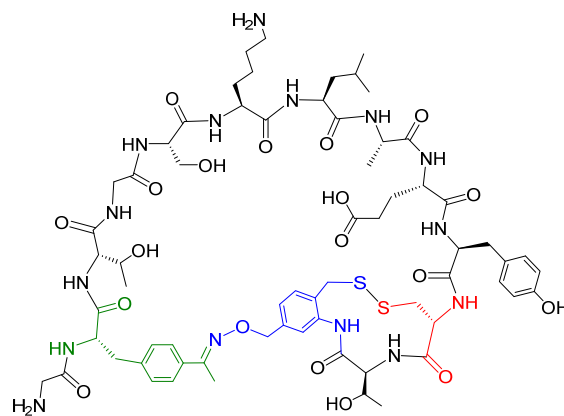

**Supplementary Figure S5.** Iodoacetamide thiol alkylation experiments. MALDI-TOF spectrum of post-cyclization products (6 hours) from the reaction between (A) MG8\_U+4 + **1** (SP6), and (B) MG8\_U+1 + **2** (SP4), after incubation with iodoacetamide (20 mM, 1 hour). Calculated and observed masses for self-cyclized and di-alkylated MOrPH products are provided.

**A** MG8\_U+4 / SP6 + iodoacetamide

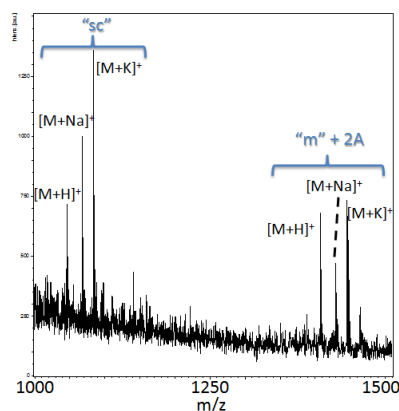

| MG8_U+4 and SP6                | Calc [M+H] <sup>+</sup> | Obs [M+H] <sup>+</sup> |
|--------------------------------|-------------------------|------------------------|
| MOrPH + 2A ("m" + 2 acetamide) | 1407.5                  | 1407.5                 |
| Thiolactone ("sc")             | 1046.2                  | 1046.1                 |

**B**

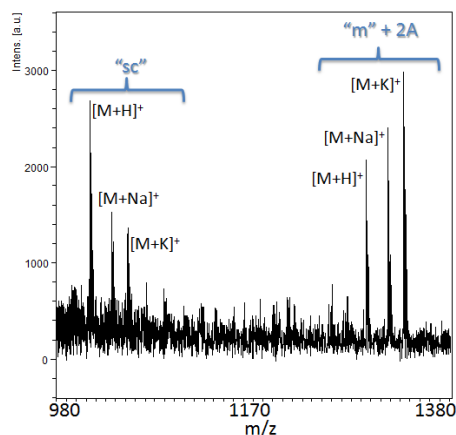

| MG8_U+1 and SP4                | Calc [M+H] <sup>+</sup> | Obs [M+H] <sup>+</sup> |
|--------------------------------|-------------------------|------------------------|
| MOrPH + 2A ("m" + 2 acetamide) | 1296.4                  | 1295.8                 |
| Thiolactone ("sc")             | 1016.1                  | 1015.5                 |
